# Supplementary material
Source: PubMed Central journal article supplement (PMC3567272)
Supplement: mmc1.pdf [file mmc1.pdf]

The American Journal of Human Genetics, Volume 92

## **Supplemental Data**

### **Mutations in *DNA2* Link Progressive Myopathy**

#### **to Mitochondrial DNA Instability**

Dario Ronchi, Alessio Di Fonzo, Weiqiang Lin, Andreina Bordoni, Changwei Liu, Elisa Fassone, Serena Pagliarani, Mafalda Rizzuti, Li Zheng, Massimiliano Filosto, Maria Teresa Ferrò, Michela Ranieri, Francesca Magri, Lorenzo Peverelli, Hongzhi Li, Yate-Ching Yuan, Stefania Corti, Monica Sciacco, Maurizio Moggio, Nereo Bresolin, Binghui Shen, and Giacomo Pietro Comi

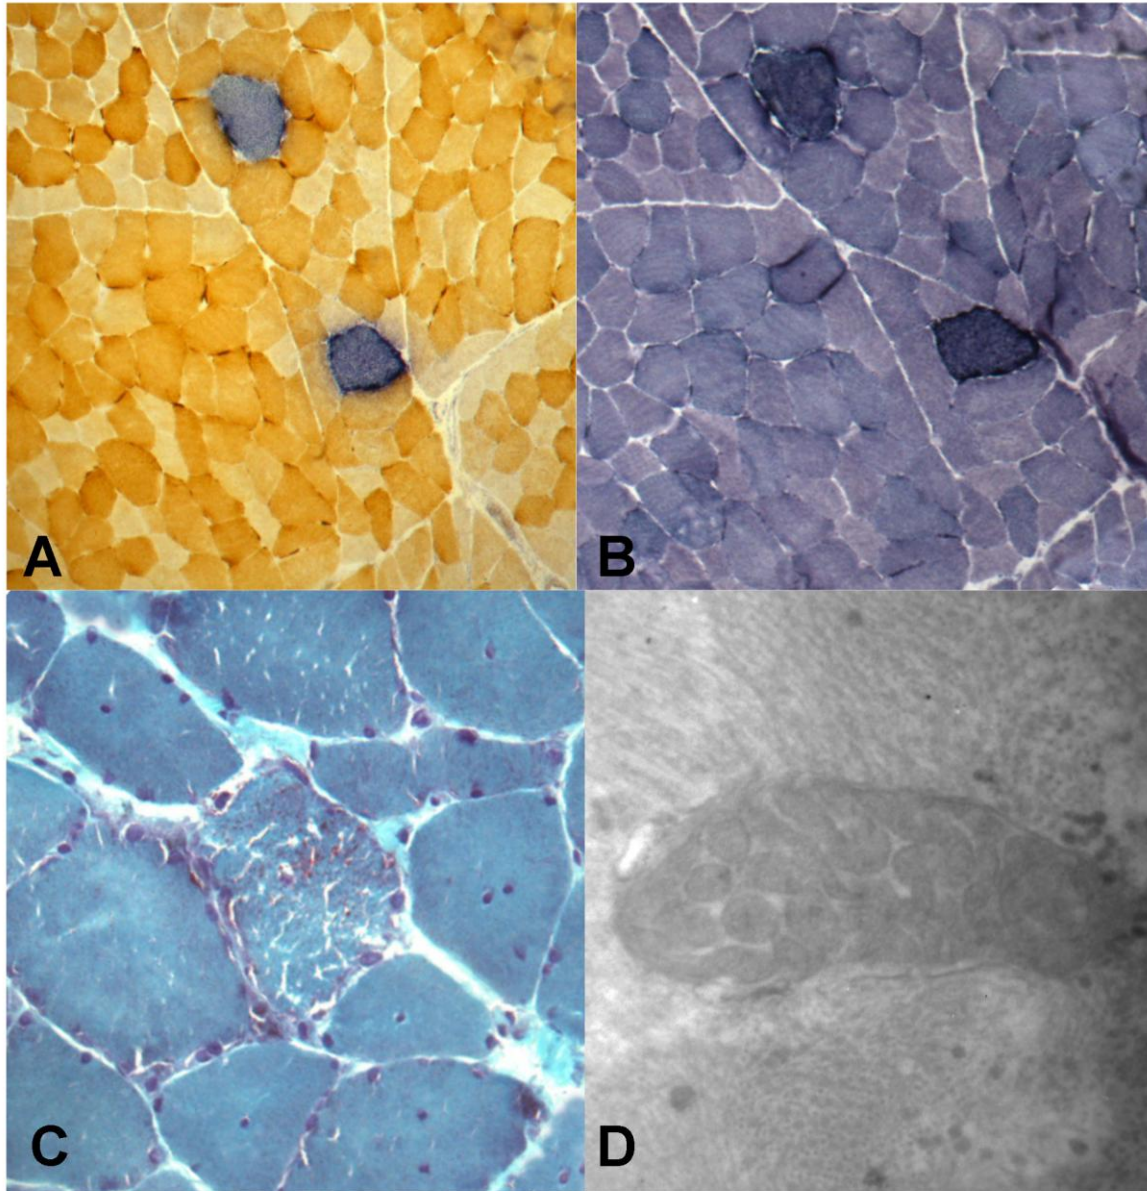

**Figure S1. Histological and Ultrastructural Studies in Patients' Muscle**

Muscle samples were frozen in cooled isopentane and stored in liquid nitrogen for histological and histochemical analyses, including modified Gomori trichrome staining, COX activity, SDH activity and double COX/SDH staining according to standard protocols.

(A and B) Scattered COX-negative fibers (A) with mitochondrial proliferation (B) are evident at skeletal muscle histochemistry from P4 (A: double staining for COX-SDH; C: SDH, 10X)

(C) Gomori trichrome from P1 shows mitochondrial proliferation in a skeletal muscle fiber (Ragged Red Fiber). 25X

(D) Ultrastructural examination of P2 skeletal muscle biopsy shows a mitochondrion with packed and thickened cristae. 30X

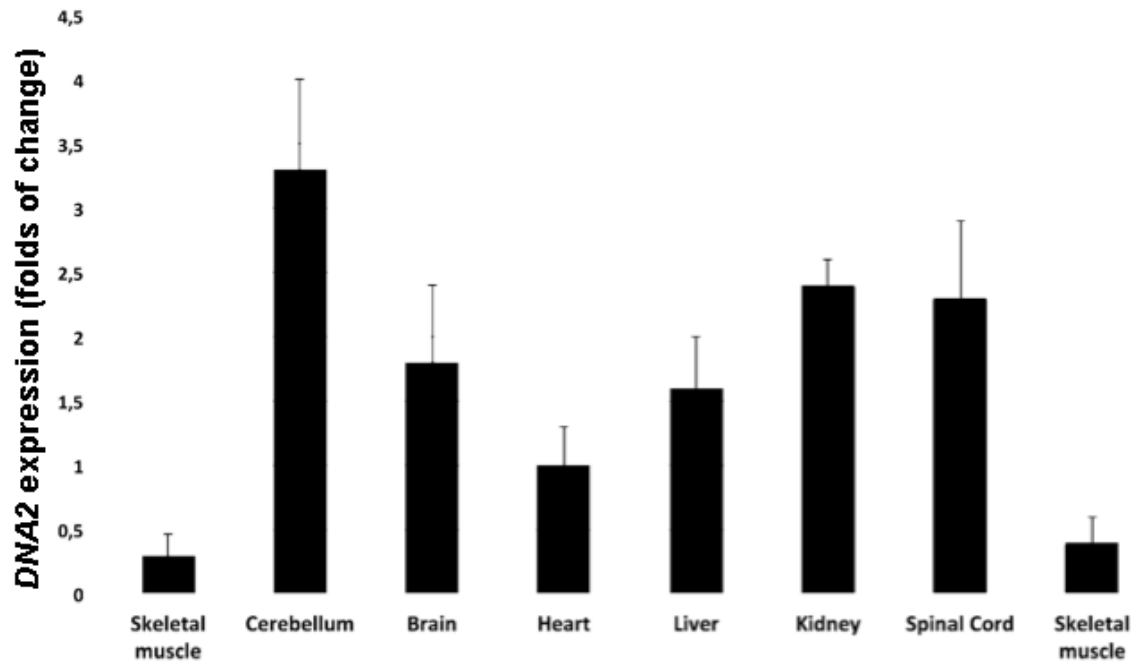

**Figure S2. Quantitative RT-PCR of *DNA2* Expression in Eight Control Tissue Samples**

*GAPDH* was used as the control housekeeping gene. The mRNA level in the heart was used for normalization of the expression data. All determinations were performed in replicates of four. Error bars indicate SEM.

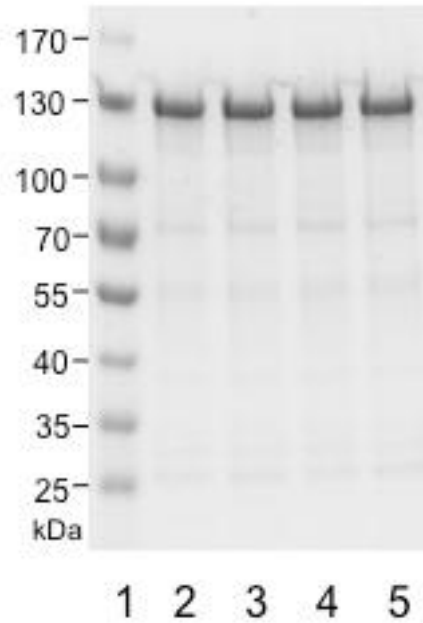

2

### Figure S3. SDS-PAGE of Purified Recombinant DNA2

pcDNA5-*DNA2* plasmid was used as the template to amplify *DNA2* cDNA using primers DNA2-NotI\_F: 5'ATAAGAATGCGGCCGC TGGAGCAGCTGAACGAACTGG3' and DNA2-BglII\_R: 5'GGAAGATCTTCATTCTCT TTGAAAGTCACCC 3'. The plasmid was reported previously [reference 9]. The PCR product was double digested by NotI and BglII (New England Biolabs), and later it was subcloned into p3xflag CMV7.1 (Sigma) mammalian transient expression vector, named as pCMV7-*DNA2*, which was confirmed by sequencing. A series of *DNA2* mutants' plasmids were constructed using PCR/ mutagenesis method with pCMV7-*DNA2* as the template. The primers for making three mitochondria mutations are listed below: DNA2-Arg284His\_F: 5' GTACCACTTAAATCTAAGTCAAGATGAAATAAAAC3'; DNA2-Arg284His\_R: 5'TTAAGTGGTACATTTTCCTTCAAATGTCTTATTTTC3'; DNA2-Lys313Glu\_F: 5'TGCATGAAAACACTTCGACTGACTTCCCTCAGATG3'; DNA2-Lys313Glu\_R: 5'GTTTTTCATGCATGAAATCTCCTGCCATTTACAAAACG3'; DNA2-Val723Ile\_F: 5'GAAAAAGATACTTCTTTCAAAGACTACACACTC3'; DNA2-Val723Ile\_R: 5'GAAGTATCTTTTTTCATCGCTTGCCTCTGAGG3'. For *DNA2* helicase assay, we created the mitochondria mutation plasmids based on pCMV7-*DNA2* Asp294Ala nuclease dead plasmid to eliminate endonuclease activity. The primers for making *DNA2* Asp294Ala is listed as follows: DNA2-NM\_F: 5' CAAAATAGCTGTTACAGTTGGTGTGAAAATACATCG3'; DNA2-NM\_R: 5'CTGTAACAGCTATTTTGCCTTTCAATCCAAACC3'.

The expression vectors were transfected into the 293T cells using Lipofectamine 2000 (Invitrogen). Recombinant *DNA2* was purified as described previously with little modification [reference 12]. In brief, cell lysate was incubated with the beads conjugated with flag antibody (SIGMA) for at least 6 hours at cold room. After wash with 500mM NaCl for 5 times, the bound proteins were eluted with Flag peptide.

Purified flag-*DNA2* proteins were subjected to 4-15% SDS-PAGE. Lane1: protein marker; Lane 2-5: *DNA2* WT, p.Arg284His, p.Lys313Glu and p.Val723Ile.
